# Supplementary material
Source: Springer Nature journal article supplement (https://www.springermedizin.de/resource/supplementary/12889_2011_3547_MOESM1_ESM.pdf/9489302)

< -2 SD (%)

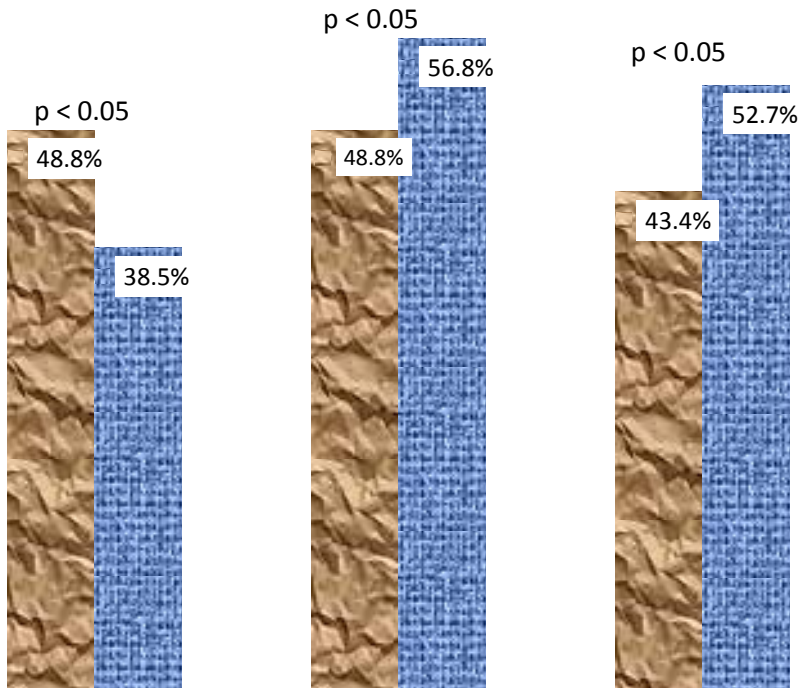

Z-Score (< -2 SD) stratified by gender

Supplement: MOESM1 [file 9489302]
